# Supplementary material for: Exploring the synergistic effect of B–N doped defective graphdiyne for N2 fixation
Source: Royal Society of Chemistry journal article supplement (doi:10.1039/d1nj00163a), 2021-01-01
Supplement: d1nj00163a1.pdf [file d1nj00163a1.pdf]

## Supporting Information

### Exploring the Synergistic Effect of B-N Doped Defective Graphdiyne for N<sub>2</sub> Fixation

Jingeng Cao, Nan Li\* and Xin Zeng\*

State Key Laboratory of Explosion Science and Technology, School of Mechatronical  
Engineering, Beijing Institute of Technology, Beijing 100081, P. R. China

\*Corresponding author: Nan Li and Xin Zeng

E-mail: [leen04@163.com](mailto:leen04@163.com) (Nan Li) and [zengxinbit@163.com](mailto:zengxinbit@163.com) (Xin Zeng)

Phone: +86-010-68914863

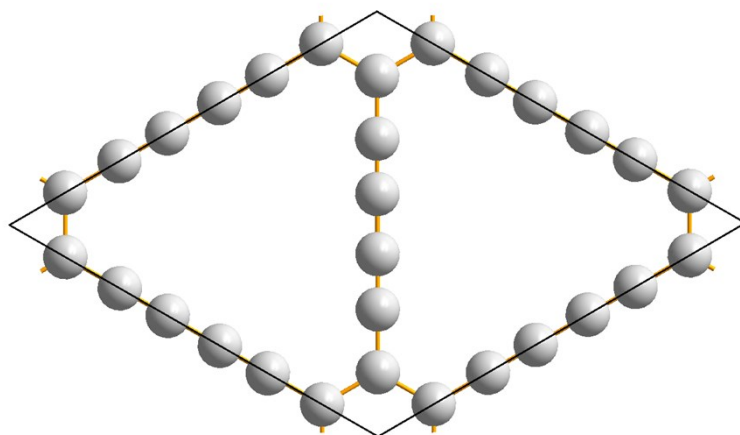

**Fig. S1** The optimized primitive unit cell of pristine GDY.

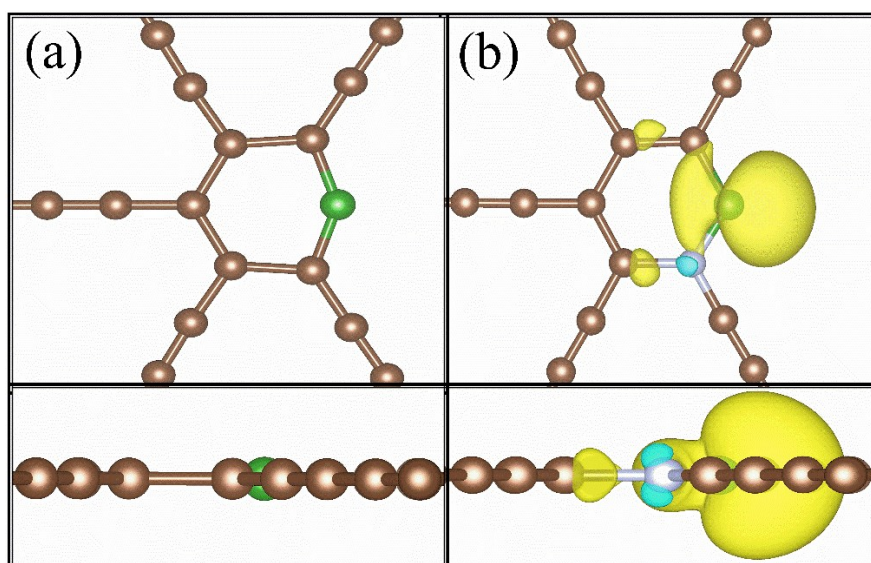

**Fig. S2** Spin-polarized charge density for (a) B@GDY and (b) BN@GDY with isosurface value of  $0.005 \text{ e/Bohr}^3$ .

## The N<sub>2</sub> adsorption ability of different B/N doping sites

We calculated the ability of different B/N doping sites for N<sub>2</sub> adsorption. Fig. S3 show the different doping sites. In order to facilitate the calculation, we choose the most stable end-on configuration for the following discussion. The obtained results are shown as following (Fig. S4-S6).

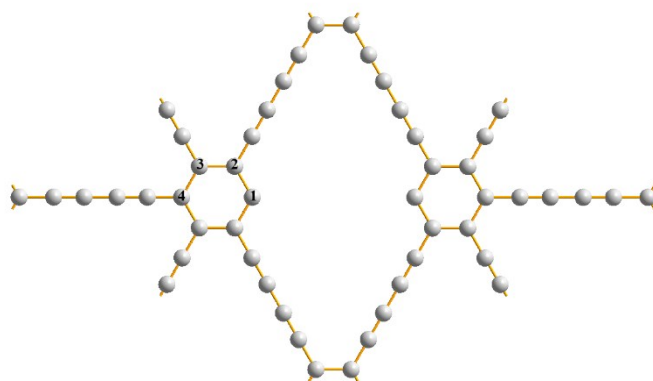

**Fig. S3** Schematic diagram of different doping sites.

For the N<sub>2</sub>-doped, N<sub>3</sub>-doped and N<sub>4</sub>-doped GDY (Fig. S4), N<sub>2</sub> can only be adsorbed on N<sub>2</sub>-doped structure due to the strong electron affinity of N element. The adsorption energy of N<sub>2</sub>-doped GDY is positive, indicating that N doped GDY cannot fix N<sub>2</sub> effectively.

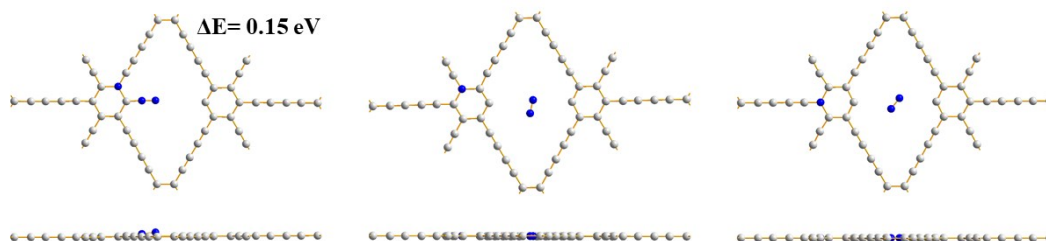

**Fig. S4** N<sub>2</sub> adsorbed on different N doping sites of GDY

For the B<sub>2</sub>-doped, B<sub>3</sub>-doped and B<sub>4</sub>-doped GDY (Fig. S5), the structure of B<sub>3</sub>-doped GDY undergoes significant deformation after optimization, therefore we will not consider it. For the remaining two structures, N<sub>2</sub> can be adsorbed with negative adsorption energy, but these are greater than B<sub>1</sub>-doped GDY (-1.56 eV).

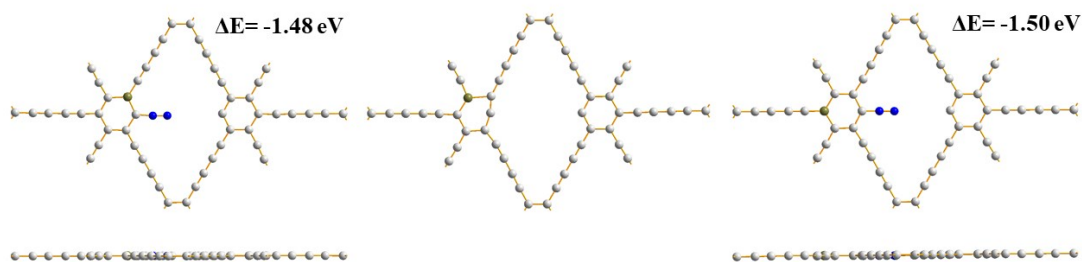

**Fig. S5**  $N_2$  adsorbed on different B doping sites of GDY

For the N1B2-doped, B2N3-doped, N2B3-doped, B3N4-doped and N3B4 doped GDY (Fig. S6),  $N_2$  can be adsorbed on B2N3-doped and B3N4-doped GDY. Adsorption energy is larger than B1N2-doped GDY (-1.70 eV). Considering all the doping configurations, B as the catalytic active center is most conducive for  $N_2$  adsorption. Thus, we mainly focus on the B1-doped and B1N2-doped structure with B active center.

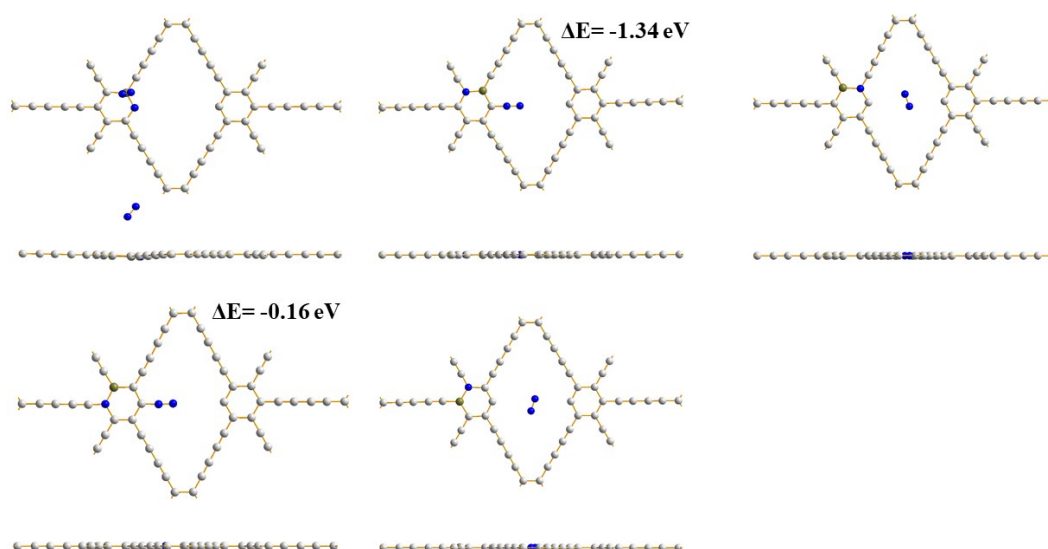

**Fig. S6**  $N_2$  adsorbed on different BN co-doping sites of GDY

## Intermediate geometries of all three mechanistic pathways

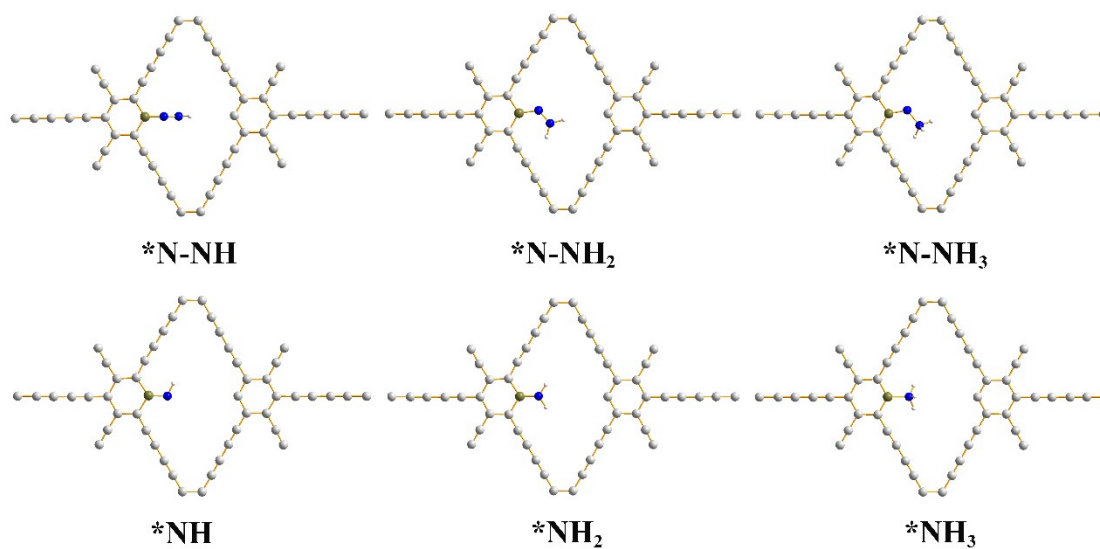

**Fig. S7** Geometries of all possible intermediate structures of distal pathway for B@GDY.

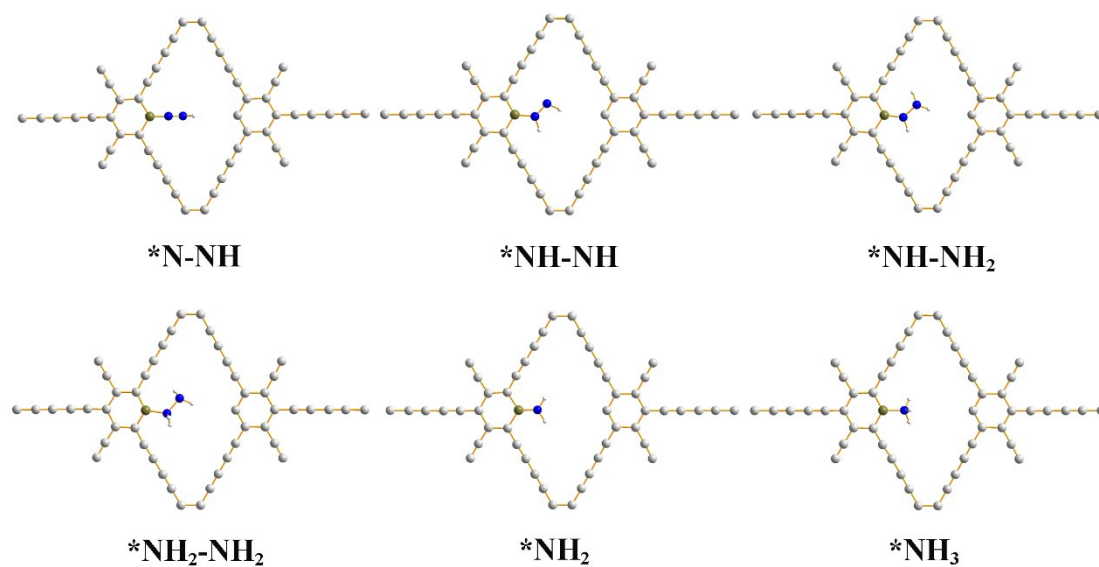

**Fig. S8** Geometries of all possible intermediate structures of alternating pathway for B@GDY.

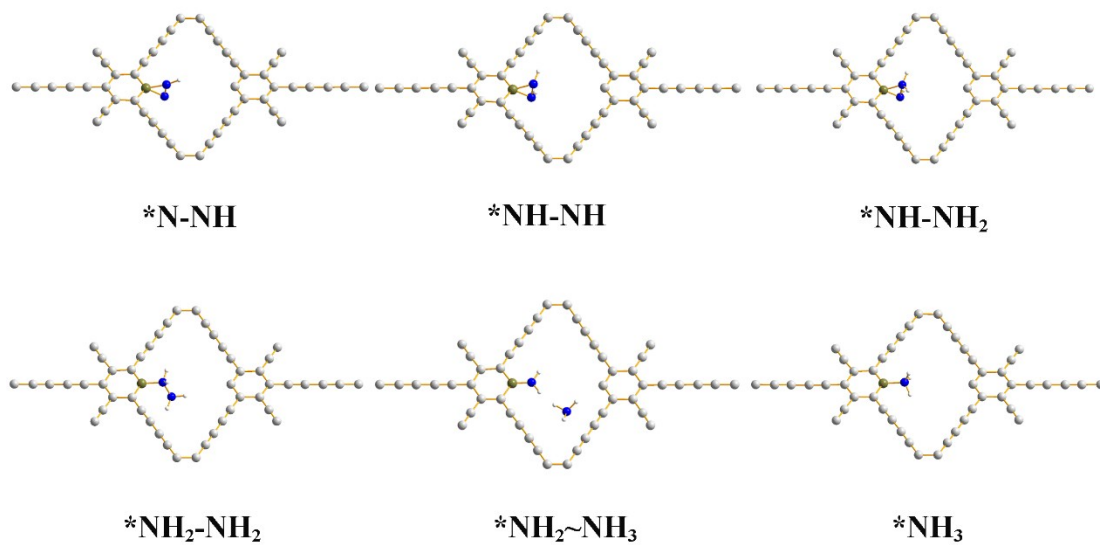

**Fig. S9** Geometries of all possible intermediate structures of enzymatic pathway for B@GDY.

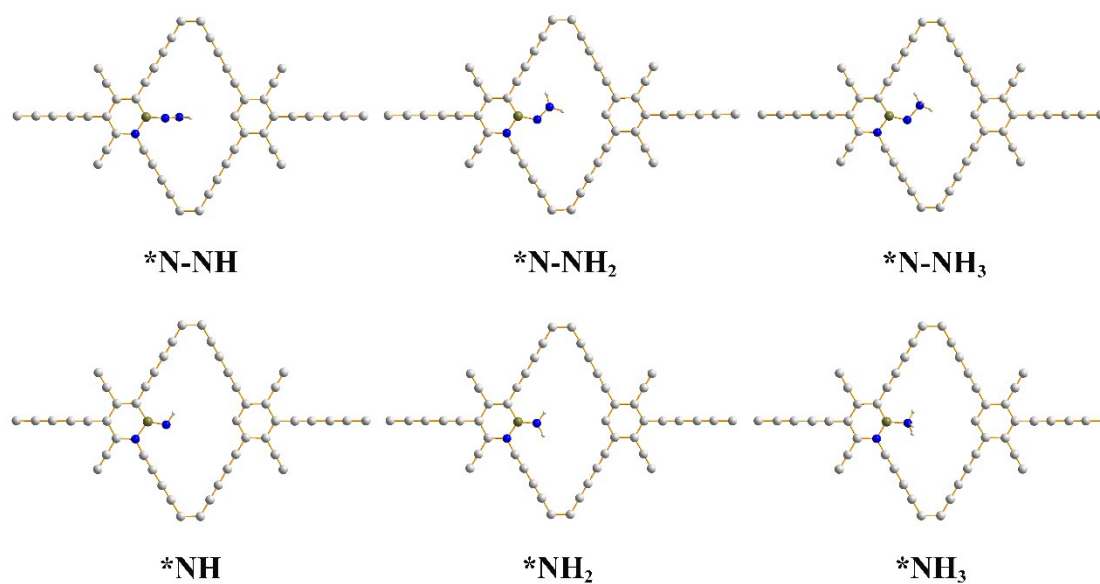

**Fig. S10** Geometries of all possible intermediate structures of distal pathway for BN@GDY.

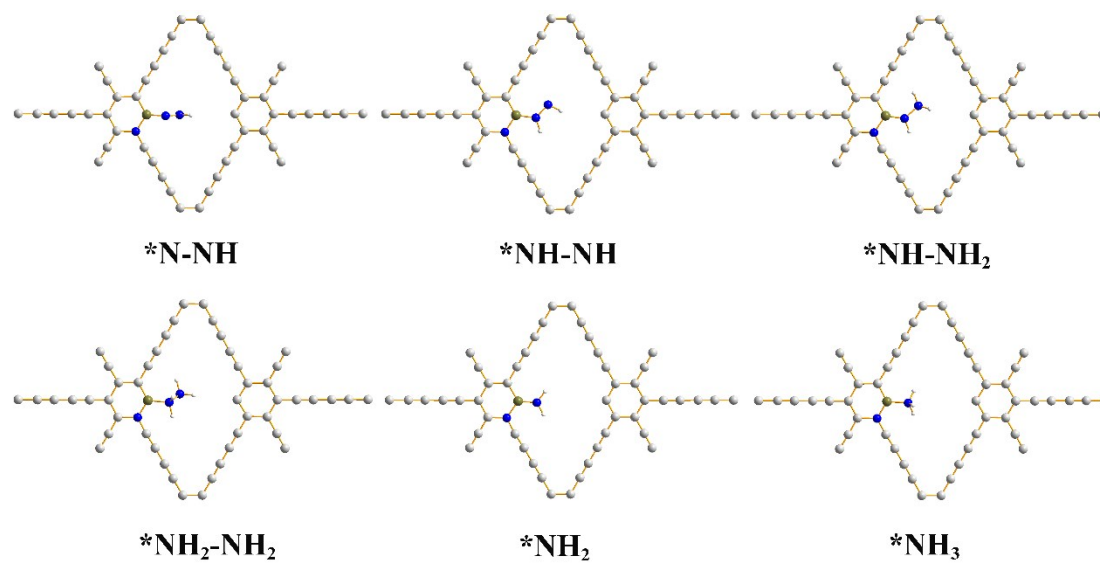

**Fig. S11** Geometries of all possible intermediate structures of alternating pathway for BN@GDY.

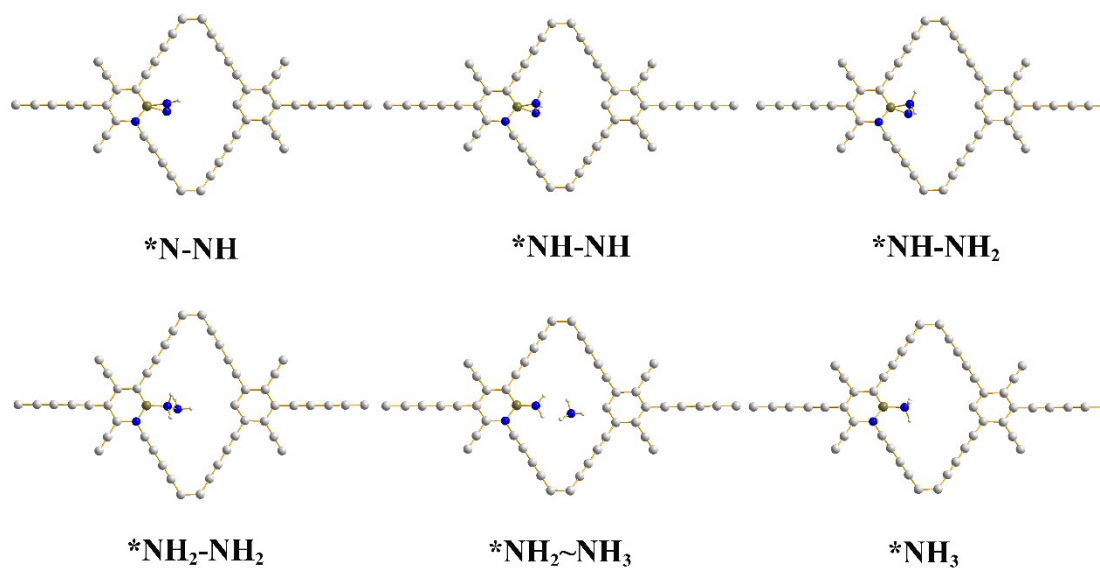

**Fig. S12** Geometries of all possible intermediate structures of enzymatic pathway for BN@GDY.

**Table S1** Calculated thermal energies for gas molecules at 298.15 K.

| Species         | $E_{ZPE}$ (eV) | $TS$ (eV) |
|-----------------|----------------|-----------|
| H <sub>2</sub>  | 0.27           | 0.40      |
| N <sub>2</sub>  | 0.15           | 0.59      |
| NH <sub>3</sub> | 0.91           | 0.60      |

**Table S2** The calculated zero-point energies ( $E_{ZPE}$ ) and entropy ( $TS$ ) of different adsorption species along distal pathway on B@GDY, where \* denotes the adsorption site and  $T$  is 298.15 K.

| Adsorption species | $E_{ZPE}$ (eV) | $TS$ (eV) |
|--------------------|----------------|-----------|
| *N <sub>2</sub>    | 0.23           | 0.13      |
| *NNH               | 0.50           | 0.14      |
| *NNH <sub>2</sub>  | 0.86           | 0.15      |
| *NNH <sub>3</sub>  | 1.19           | 0.18      |
| *NH                | 0.38           | 0.07      |
| *NH <sub>2</sub>   | 0.74           | 0.09      |
| *NH <sub>3</sub>   | 1.08           | 0.13      |

**Table S3** The calculated zero-point energies ( $E_{ZPE}$ ) and entropy ( $TS$ ) of different adsorption species along alternating pathway on B@GDY, where \* denotes the adsorption site and  $T$  is 298.15 K.

| Adsorption species               | $E_{ZPE}$ (eV) | $TS$ (eV) |
|----------------------------------|----------------|-----------|
| *N <sub>2</sub>                  | 0.23           | 0.13      |
| *NNH                             | 0.50           | 0.14      |
| *NHNH                            | 0.87           | 0.14      |
| *NHNH <sub>2</sub>               | 1.20           | 0.15      |
| *NH <sub>2</sub> NH <sub>2</sub> | 1.53           | 0.15      |
| *NH <sub>2</sub>                 | 0.74           | 0.07      |
| *NH <sub>3</sub>                 | 1.08           | 0.13      |



**Table S4** The calculated zero-point energies ( $E_{ZPE}$ ) and entropy ( $TS$ ) of different adsorption species along enzymatic pathway on B@GDY, where \* denotes the adsorption site and  $T$  is 298.15 K.

| Adsorption species               | $E_{ZPE}$ (eV) | $TS$ (eV) |
|----------------------------------|----------------|-----------|
| *N <sub>2</sub>                  | 0.20           | 0.14      |
| *NNH                             | 0.50           | 0.14      |
| *NHNH                            | 0.83           | 0.15      |
| *NHNH <sub>2</sub>               | 1.20           | 0.13      |
| *NH <sub>2</sub> NH <sub>2</sub> | 1.54           | 0.18      |
| *NH <sub>2</sub> NH <sub>3</sub> | 1.70           | 0.31      |
| *NH <sub>3</sub>                 | 1.08           | 0.13      |

**Table S5** The calculated zero-point energies ( $E_{ZPE}$ ) and entropy ( $TS$ ) of different adsorption species along distal pathway on BN@GDY, where \* denotes the adsorption site and  $T$  is 298.15 K.

| Adsorption species | $E_{ZPE}$ (eV) | $TS$ (eV) |
|--------------------|----------------|-----------|
| *N <sub>2</sub>    | 0.22           | 0.13      |
| *NNH               | 0.50           | 0.14      |
| *NNH <sub>2</sub>  | 0.85           | 0.13      |
| *NNH <sub>3</sub>  | 1.20           | 0.16      |
| *NH                | 0.38           | 0.07      |
| *NH <sub>2</sub>   | 0.74           | 0.08      |
| *NH <sub>3</sub>   | 1.08           | 0.11      |

**Table S6** The calculated zero-point energies ( $E_{ZPE}$ ) and entropy ( $TS$ ) of different adsorption species along alternating pathway on BN@GDY, where \* denotes the adsorption site and  $T$  is 298.15 K.

| Adsorption species               | $E_{ZPE}$ (eV) | $TS$ (eV) |
|----------------------------------|----------------|-----------|
| *N <sub>2</sub>                  | 0.22           | 0.13      |
| *NNH                             | 0.50           | 0.14      |
| *NHNH                            | 0.86           | 0.14      |
| *NHNH <sub>2</sub>               | 1.19           | 0.15      |
| *NH <sub>2</sub> NH <sub>2</sub> | 1.55           | 0.16      |
| *NH <sub>2</sub>                 | 0.74           | 0.08      |
| *NH <sub>3</sub>                 | 1.08           | 0.11      |

**Table S7** The calculated zero-point energies ( $E_{ZPE}$ ) and entropy ( $TS$ ) of different adsorption species along enzymatic pathway on B@GDY, where \* denotes the adsorption site and  $T$  is 298.15 K.

| Adsorption species               | $E_{ZPE}$ (eV) | $TS$ (eV) |
|----------------------------------|----------------|-----------|
| *N <sub>2</sub>                  | 0.20           | 0.12      |
| *NNH                             | 0.50           | 0.13      |
| *NHNH                            | 0.83           | 0.12      |
| *NHNH <sub>2</sub>               | 1.19           | 0.13      |
| *NH <sub>2</sub> NH <sub>2</sub> | 1.54           | 0.18      |
| *NH <sub>2</sub> NH <sub>3</sub> | 1.71           | 0.26      |
| *NH <sub>3</sub>                 | 1.08           | 0.12      |
